# Supplementary material for: Probing the Potential Energy Profile of the I + (H2O)3 → HI + (H2O)2OH Forward and Reverse Reactions: High Level CCSD(T) Studies with Spin-Orbit Coupling Included
Source: MDPI journal article supplement (doi:10.3390/molecules28020904), 2023-01-16
Supplement: s1 [file s1]

# Probing the Potential Energy Profile of the $\text{I} + (\text{H}_2\text{O})_3 \rightarrow \text{HI} + (\text{H}_2\text{O})_2\text{OH}$ Forward and Reverse Reactions: High Level CCSD(T) Studies with Spin-Orbit Coupling Included

Xinyuan Zhang <sup>1,†</sup>, Xiaoting Chen <sup>1,†</sup>, Yan Lin <sup>1</sup>, Yan Meng <sup>1</sup>, Guoliang Li <sup>1,\*</sup>, Yaoming Xie <sup>2</sup> and Henry F. Schaefer III <sup>2,\*</sup>

<sup>1</sup> Key Laboratory of Theoretical Chemistry of Environment, Ministry of Education; School of Chemistry, South China Normal University, Guangzhou 510006, China

<sup>2</sup> Center for Computational Quantum Chemistry, University of Georgia, Athens, GA 30602, USA

\* Correspondence: glli@scnu.edu.cn (G.L.); ccq@uga.edu (H.F.S.III)

† These authors contributed equally to this work.

**Figure S1.** Three pathways of the water trimer reaction  $\text{I} + (\text{H}_2\text{O})_3 \rightarrow \text{HI} + (\text{H}_2\text{O})_2\text{OH}$  with the MPW1K/cc-pVTZ(-PP) method.

**Table S1.** Harmonic vibrational frequencies and zero-point energies for the stationary points of the  $\text{I} + (\text{H}_2\text{O})_3 \rightarrow \text{HI} + (\text{H}_2\text{O})_2\text{OH}$  reaction obtained at the CCSD(T)/cc-pVTZ(-PP) level of theory.

**Table S2.** Relative Gibbs free energies for all stationary points of the  $\text{I} + (\text{H}_2\text{O})_3 \rightarrow \text{HI} + (\text{H}_2\text{O})_2\text{OH}$  reaction at various conditions.

Complete Gaussian 16 reference.

---

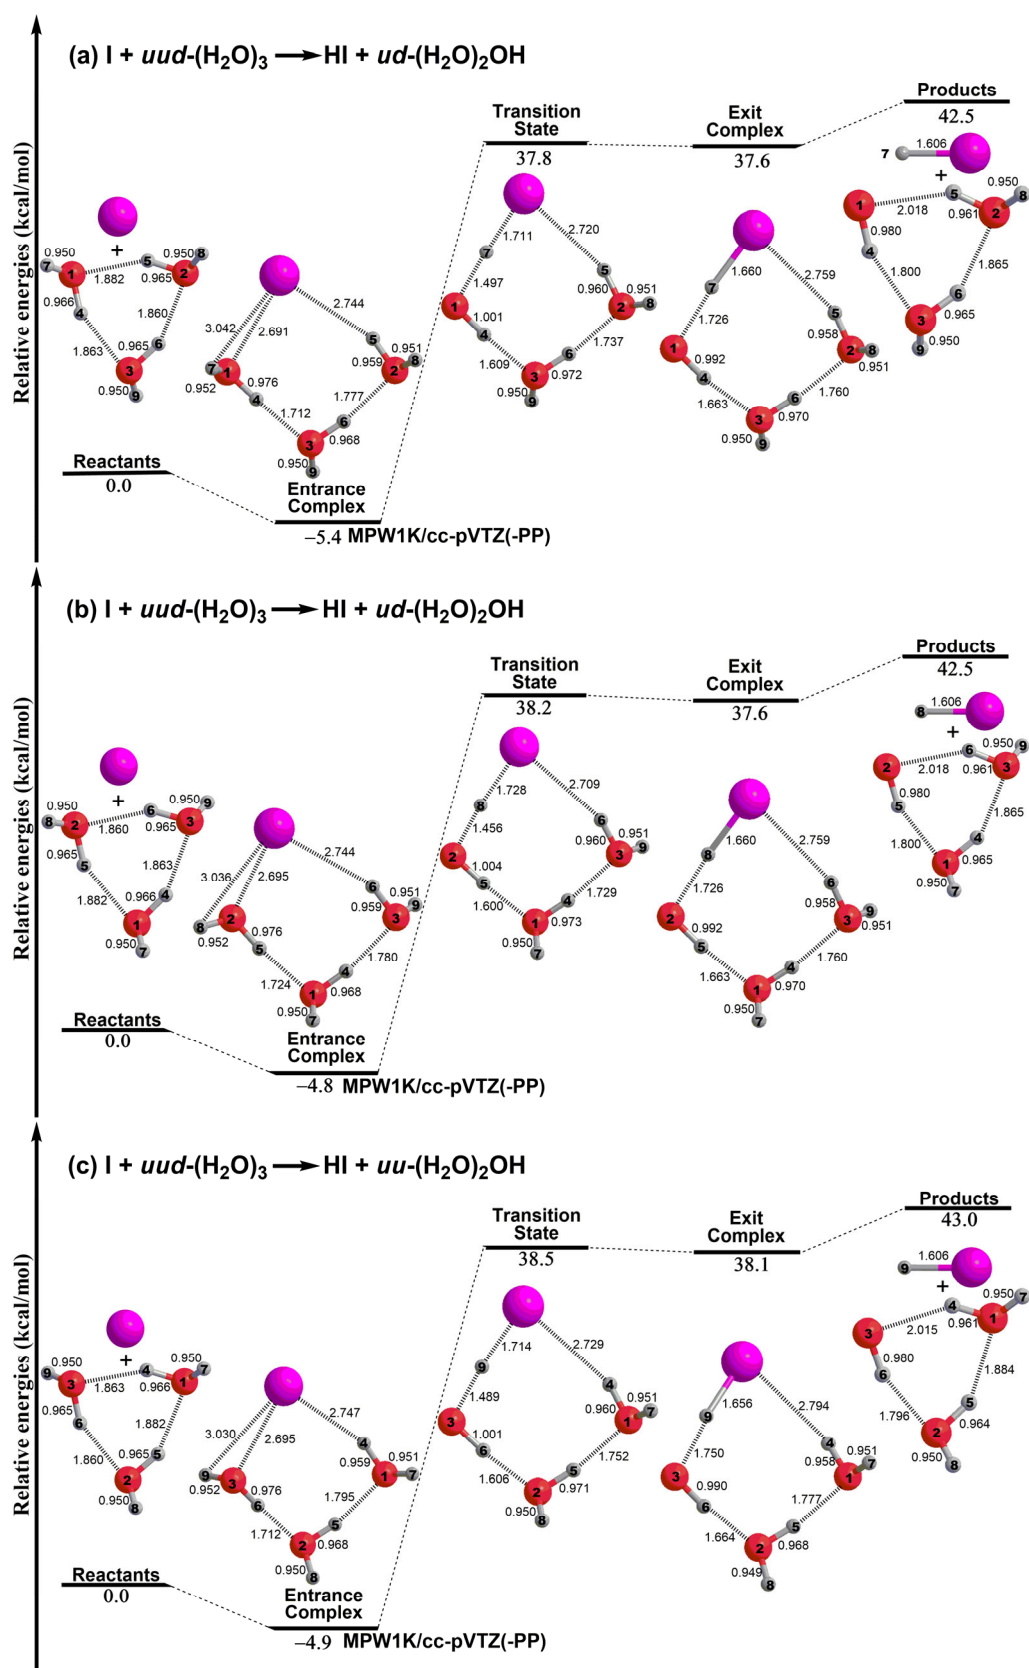

Figure S1 Three pathways of the water trimer reaction  $I + (H_2O)_3 \rightarrow HI + (H_2O)_2OH$  with the MPW1K/cc-pVTZ(-PP) method. All bond distances were given in angstroms.

**Table S1.** Harmonic vibrational frequencies (in  $\text{cm}^{-1}$ ) and zero-point energies (ZPE, in kcal/mol) for the stationary points of the  $\text{I} + (\text{H}_2\text{O})_3 \rightarrow \text{HI} + (\text{H}_2\text{O})_2\text{OH}$  reaction obtained at the CCSD(T)/cc-pVTZ(-PP) level of theory. Experimental results are also shown for comparison.

|                                                 | ZPE   | $\Delta\text{ZPE}$ | Vibrational Frequencies                                                                                                        |
|-------------------------------------------------|-------|--------------------|--------------------------------------------------------------------------------------------------------------------------------|
| $(\text{H}_2\text{O})_3$                        | 46.46 | 0.00               | 188, 194, 202, 209, 228, 253, 360, 372, 471, 614, 689, 926, 1685, 1690, 1707, 3613, 3683, 3689, 3903, 3907, 3909               |
| Entrance Complex                                | 46.43 | -0.03              | 30, 53, 100, 151, 180, 220, 237, 250, 261, 343, 390, 445, 491, 755, 903, 1670, 1689, 1706, 3521, 3635, 3769, 3876, 3900, 3901  |
| Transition State                                | 41.66 | -4.80              | 307i, 30, 63, 101, 186, 214, 252, 277, 286, 406, 481, 493, 577, 689, 814, 1016, 1451, 1669, 1700, 3271, 3598, 3766, 3900, 3902 |
| Exit Complex                                    | 42.05 | -4.41              | 28, 46, 95, 115, 167, 215, 240, 267, 270, 331, 366, 446, 480, 597, 758, 903, 1670, 1698, 2093, 3410, 3626, 3780, 3901, 3907    |
| $(\text{H}_2\text{O})_2\text{OH}$               | 37.85 | -5.30              | 163, 196, 211, 230, 252, 291, 375, 534, 557, 668, 916, 1667, 1687, 3498, 3675, 3736, 3908, 3911                                |
| HI                                              | 3.31  |                    | 2314                                                                                                                           |
| <b>Experiment</b>                               |       |                    |                                                                                                                                |
| Bonded OH in $(\text{H}_2\text{O})_3$           |       |                    | 3533, <sup>a</sup> 3544/3529, <sup>b</sup> 3528, <sup>c</sup> 3531.8 $\pm$ 1.2, <sup>d</sup> 3516.7 $\pm$ 2.3 <sup>d</sup>     |
| Free OH in $(\text{H}_2\text{O})_3$             |       |                    | 3726, <sup>a</sup> 3717 <sup>b</sup>                                                                                           |
| OH radical in $(\text{H}_2\text{O})_2\text{OH}$ |       |                    | 3365.2 <sup>c</sup>                                                                                                            |
| HI                                              |       |                    | 2309 <sup>e</sup>                                                                                                              |

<sup>a</sup> In gas phase from Ref. 26. <sup>b</sup> In liquid He from Ref. 26. <sup>c</sup> In solid Ne from Ref. 27.

<sup>d</sup> From Ref. 28. <sup>e</sup> From Ref. 29, which is a harmonic vibrational frequency.

**Table S2.** Relative Gibbs free energies ( $\Delta G$ , in kcal/mol) for all stationary points of the  $\text{I} + (\text{H}_2\text{O})_3 \rightarrow \text{HI} + (\text{H}_2\text{O})_2\text{OH}$  reaction, as shown in Figure 1, at various conditions.<sup>a</sup>

|                                            | T = 600 K<br>p = 160 atm | T = 298.15 K<br>p = 1.0 atm | T = 200 K<br>p = 0.2 atm |
|--------------------------------------------|--------------------------|-----------------------------|--------------------------|
| <b>I + (H<sub>2</sub>O)<sub>3</sub></b>    | 0.0                      | 0.0                         | 0.0                      |
| <b>Entrance Complex</b>                    | 1.6                      | 2.1                         | 0.8                      |
| <b>Transtion State</b>                     | 46.1                     | 45.3                        | 43.7                     |
| <b>Exit Complex</b>                        | 42.1                     | 43.4                        | 42.3                     |
| <b>HI + (H<sub>2</sub>O)<sub>2</sub>OH</b> | 37.1                     | 39.3                        | 40.0                     |

<sup>a</sup> Total energies (E) were obtained at the CCSD(T)/cc-pVTZ(-PP) level of theory.

## Complete Gaussian 16 reference

M. J. Frisch, G. W. Trucks, H. B. Schlegel, G. E. Scuseria, M. A. Robb, J. R. Cheeseman, G. Scalmani, V. Barone, G. A. Petersson, H. Nakatsuji, X. Li, M. Caricato, A. V. Marenich, J. Bloino, B. G. Janesko, R. Gomperts, B. Mennucci, H. P. Hratchian, J. V. Ortiz, A. F. Izmaylov, J. L. Sonnenberg, D. Williams-Young, F. Ding, F. Lipparini, F. Egidi, J. Goings, B. Peng, A. Petrone, T. Henderson, D. Ranasinghe, V. G. Zakrzewski, J. Gao, N. Rega, G. Zheng, W. Liang, M. Hada, M. Ehara, K. Toyota, R. Fukuda, J. Hasegawa, M. Ishida, T. Nakajima, Y. Honda, O. Kitao, H. Nakai, T. Vreven, K. Throssell, J. A. Montgomery, Jr., J. E. Peralta, F. Ogliaro, M. J. Bearpark, J. J. Heyd, E. N. Brothers, K. N. Kudin, V. N. Staroverov, T. A. Keith, R. Kobayashi, J. Normand, K. Raghavachari, A. P. Rendell, J. C. Burant, S. S. Iyengar, J. Tomasi, M. Cossi, J. M. Millam, M. Klene, C. Adamo, R. Cammi, J. W. Ochterski, R. L. Martin, K. Morokuma, O. Farkas, J. B. Foresman, and D. J. Fox, Gaussian 16, Revision B.01, Gaussian, Inc., Wallingford CT, **2016**.
